# Supplementary material for: A highly selective and reversible water-soluble polymer based-colorimetric chemosensor for rapid detection of Cu2+ in pure aqueous solution
Source: Royal Society of Chemistry journal article supplement (doi:10.1039/c5nj03526k), 2016-01-01
Supplement: c5nj03526k1.pdf [file c5nj03526k1.pdf]

## Supporting Information

### **Highly selective and reversible water-soluble polymer based-colorimetric chemosensor for rapid detection of Cu<sup>2+</sup> in pure aqueous solution**

**Guang Li,\* Farong Tao, Qian Liu, Liping Wang, Zhuang Wei, Fen Zhu, Wenxiu Chen, Houyu Sun and Yujie Zhou**

*School of Materials Science and Engineering, Liaocheng University, Liaocheng 252059, China. Fax: +86 635 8230831; Tel: +86 635 8230919; E-mail: lglzsd@126.com*

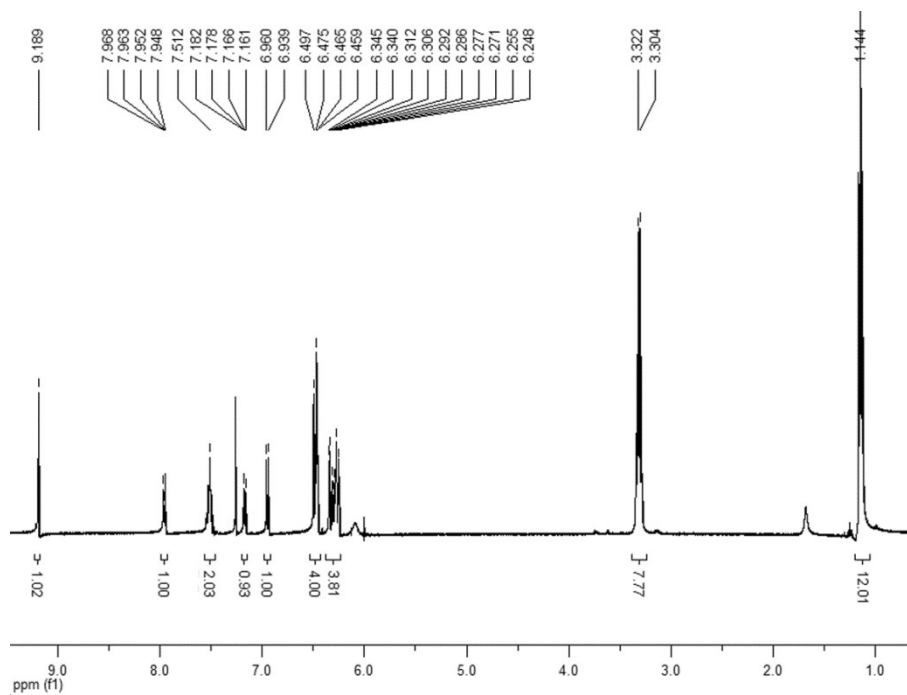

**Fig. S1**  $^1\text{H}$  NMR spectrum of RhBHB in  $\text{CDCl}_3$ .

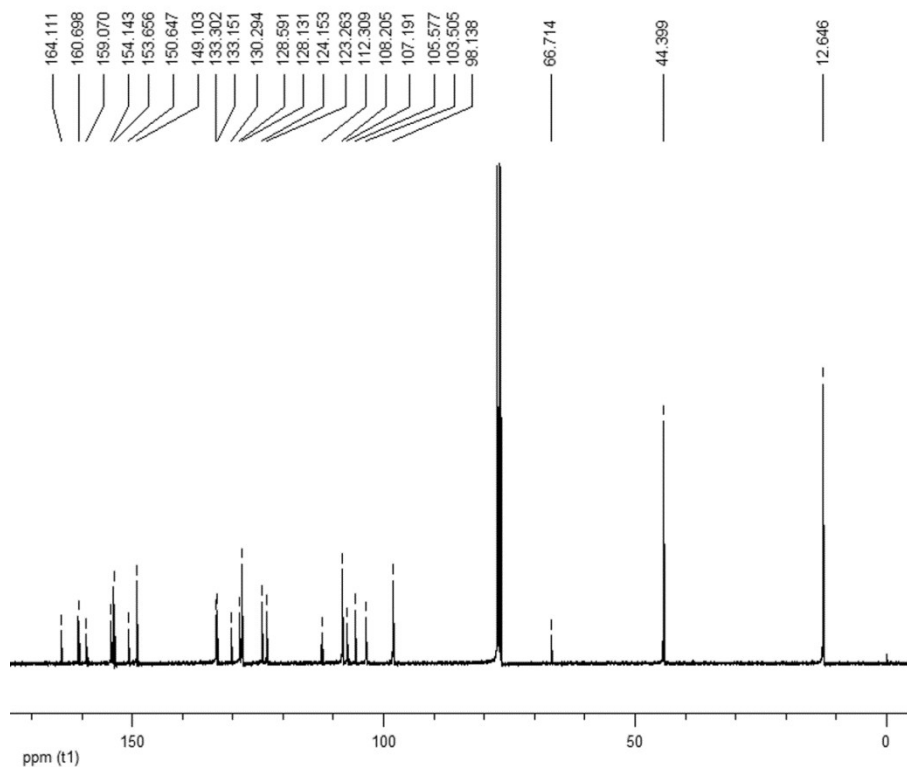

**Fig. S2**  $^{13}\text{C}$  NMR spectrum of RhBHB in  $\text{CDCl}_3$ .

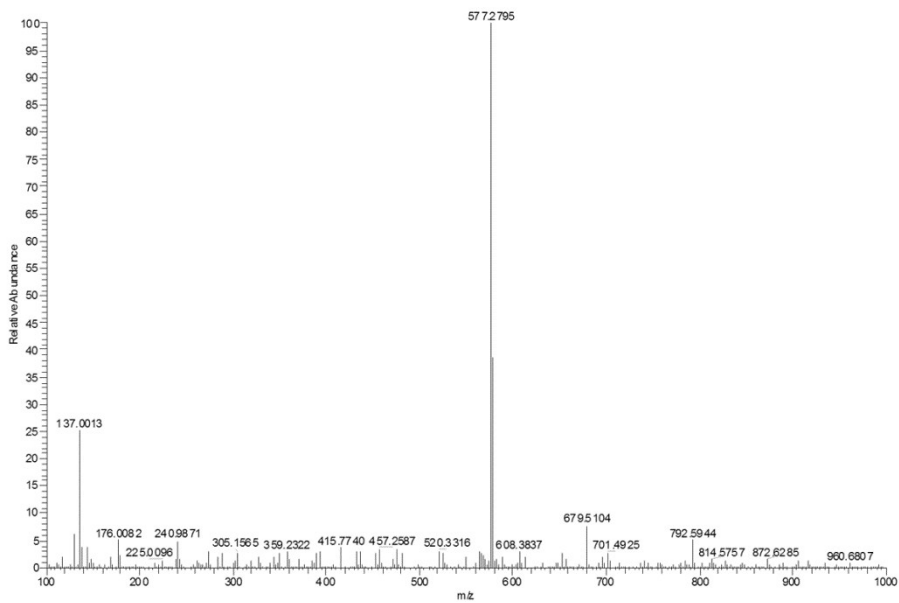

**Fig. S3** HRMS of RhBHB.

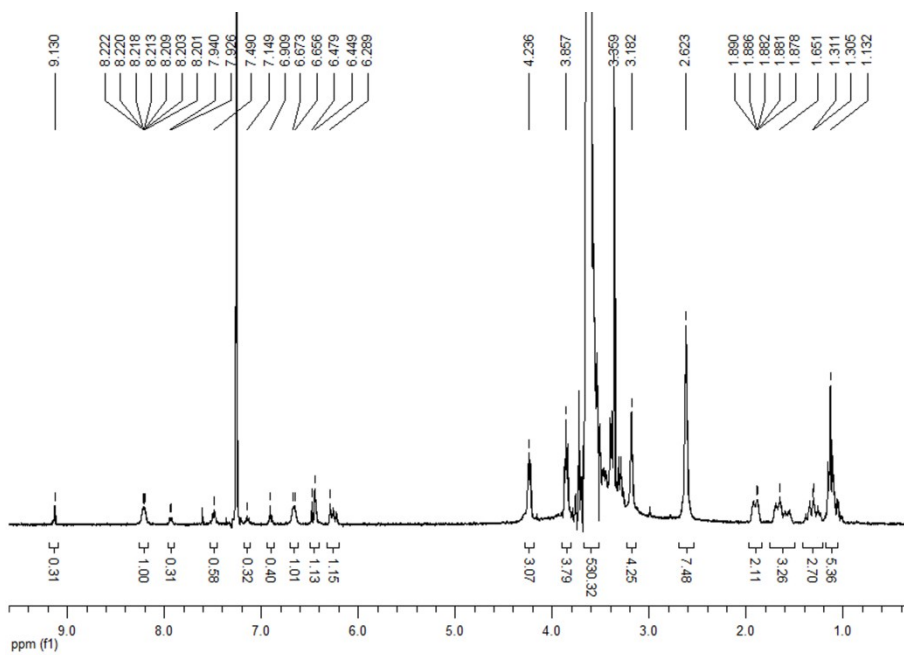

**Fig. S4** <sup>1</sup>H NMR spectrum of PEGRh in CDCl<sub>3</sub>.

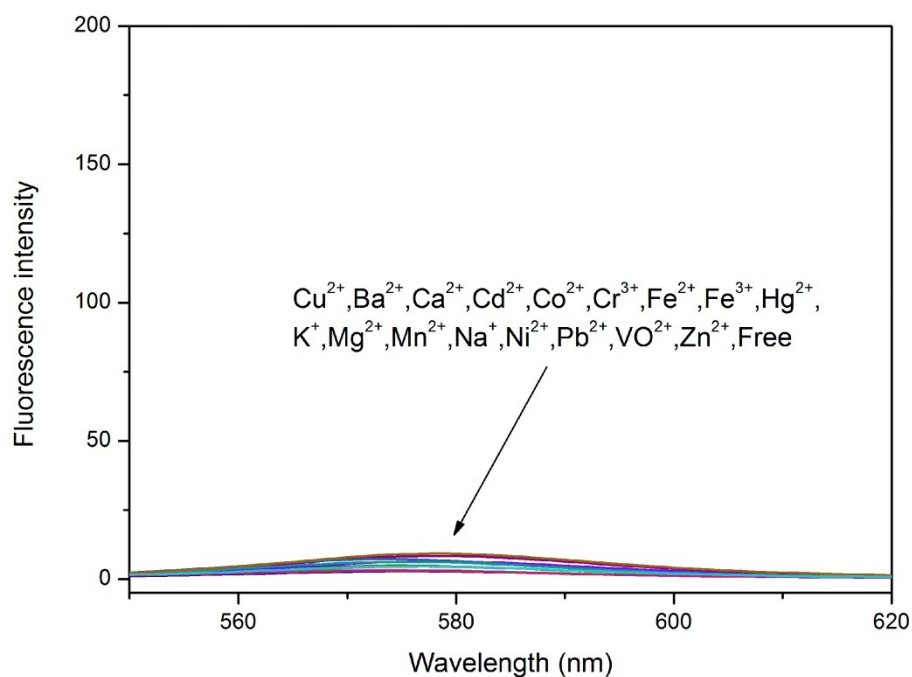

**Fig. S5** Fluorescence spectra of PEGRh in aqueous solution (10  $\mu\text{M}$ ) upon addition of 5 equiv. of various metal ions. (Ex. 520 nm)

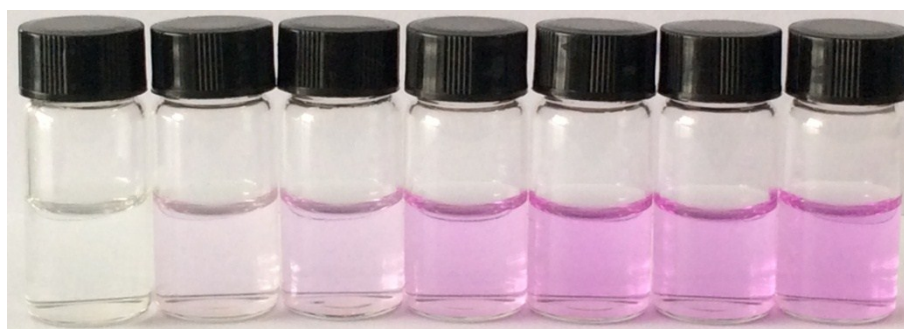

**Fig. S6** Color changes of PEGRh in aqueous solution (10  $\mu\text{M}$ ) upon addition of varying quantities of  $\text{Cu}^{2+}$  ions (from left to right: 0, 0.05, 0.1, 0.25, 0.5, 1.0, 2.0 equiv.).

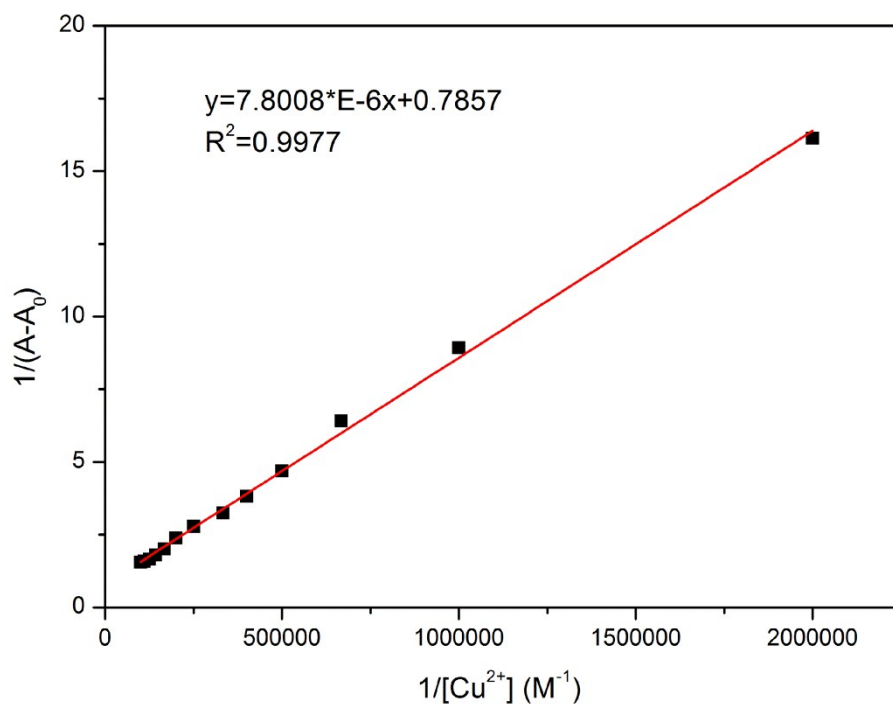

**Fig. S7** Benesi-Hildebrand plot (absorbance at 561 nm) of PEGRh with  $Cu^{2+}$ .

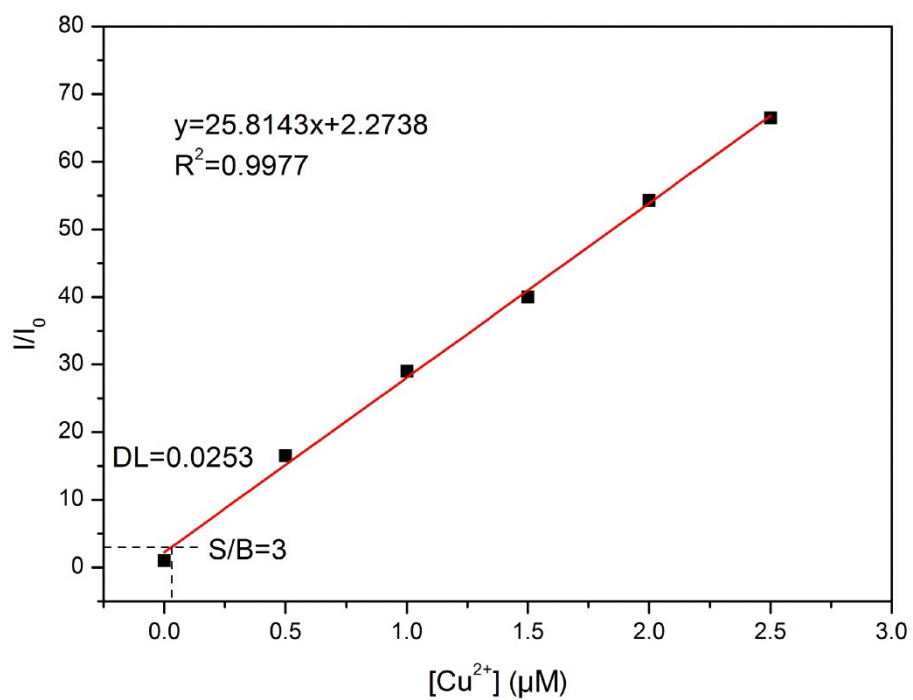

**Fig. S8** Determination of the detection limit based on change in the ratio (absorbance at 561 nm) of PEGRh (10  $\mu M$ ) with  $Cu^{2+}$ .

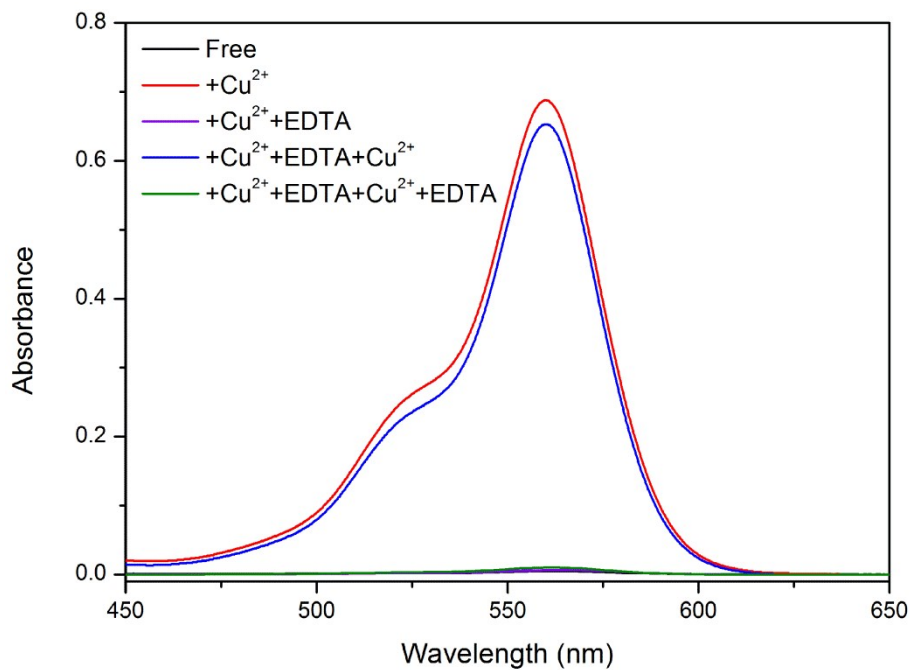

**Fig. S9** UV-vis absorption spectra of PEGRh in aqueous solution (10  $\mu\text{M}$ ) upon alternate addition of 2 equiv. of  $\text{Cu}^{2+}$  and 2 equiv. of EDTA ions.

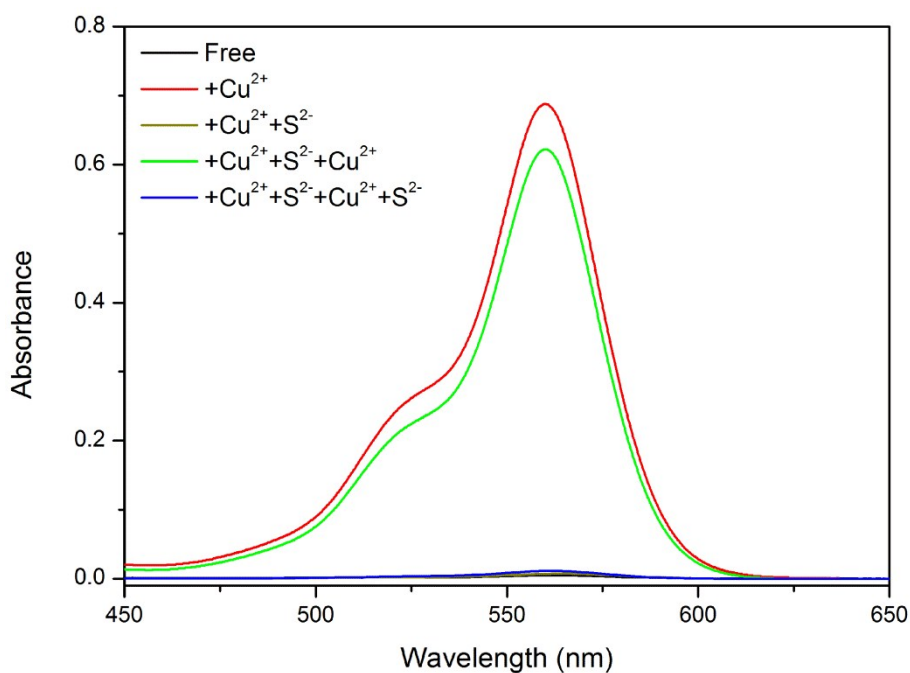

**Fig. S10** UV-vis absorption spectra of PEGRh in aqueous solution (10  $\mu\text{M}$ ) upon alternate addition of 2 equiv. of  $\text{Cu}^{2+}$  and 2 equiv. of  $\text{S}^{2-}$  ions.
